# Supplementary material for: Pyrrolidinium lead iodide from crystallography: a new perovskite with low bandgap and good water resistance
Source: Royal Society of Chemistry journal article supplement (doi:10.1039/c8cc10135c), 2019-01-01
Supplement: c8cc10135c1.pdf [file c8cc10135c1.pdf]

Electronic supporting information for paper

## **Pyrrolidinium lead iodide from crystallography: a new perovskite with low bandgap and good water resistance**

Alex Fan Xu,<sup>a</sup> Ryan Taoran Wang,<sup>a</sup> Wenjuan Yang,<sup>a</sup> Victoria Jarvis,<sup>b</sup> James F. Britten<sup>b</sup> and Gu Xu<sup>a\*</sup>

<sup>a</sup> Department of Materials Science and Engineering, McMaster University, 1280 Main ST W, Hamilton, ON, Canada L8S 4L8.

<sup>b</sup> MAX Diffraction Facility, Department of Chemistry, McMaster University, 1280 Main St. W, Hamilton, On, Canada L8S 4M1

### 1. Thin film synthesis

1m Mol of pyrrolidinium hydroiodide (98%, TCI) and 1m Mol of lead iodide (99.999%, Sigma) were dissolved in 1ml DMF (99.99%, Sigma), respectively. Drop casting method and spin coating were adopted to fabricate the perovskite films. After annealing at 120°C for 1-hour, polycrystalline films were obtained from both methods. We then extracted yellow needle-like single crystal from the drop casting film.

### 2. Powder X-ray diffraction study

X-ray powder diffraction (XRD) patterns of polycrystalline material were collected using a Bruker-AXS D8 DISCOVER X-ray diffractometer with CuK $\alpha$ 1 radiation ( $\lambda = 1.79026 \text{ \AA}$ ) in the range of 8–78° (2 $\theta$ ) with a step size of 0.002° and a time setting of 0.1 s per step.

### 3. Single crystal X-ray diffraction study

Data-sets of hexagonal PyPbI<sub>3</sub> were collected using a Bruker APEX-II diffractometer equipped with a CCD detector (graphite-monochromatized Mo-K $\alpha$  radiation,  $\lambda = 0.71073 \text{ \AA}$ ) at 297K. Data integration and cell refinement were performed using the Olex2 software.<sup>1</sup> The structure was analyzed by direct methods and refined using the XL (Sheldrick, 2008) software package.<sup>2</sup> All nonhydrogen atoms of the structure were refined with anisotropic thermal parameters, and the refinements converged for  $F_o^2 > 2\sigma(F_o^2)$ . All the calculations were performed using SHELXTL crystallographic software package. Symmetry analysis on the model using PLATON revealed that no obvious space group change was needed. In the refinement, the commands EDAP and EXYZ were used to restrain some of the related bond lengths and bond angles. CCDC-1886890 contains the supplementary crystallographic data for this paper. These data can be obtained free of charge from the Cambridge Crystallographic Data Centre via [www.ccdc.cam.ac.uk/data\\_request/cif](http://www.ccdc.cam.ac.uk/data_request/cif). The experimental data and are given in table S1.

### 4. Optical properties tests

UV-vis spectra were acquired from thin film samples at room temperature using a DU 800 Spectrophotometer. The Tauc plot was used to estimate the bandgap of the material.

The photoluminescence test is conducted by Ar-ion laser (excitation wavelength=514.5 nm) at room temperature from Melles Griot (35LAP431208) at a power of 130mW with a repetition rate of 50 Hz. The PL signals were collected using a liquid N<sub>2</sub>-cooled silicon CCD.

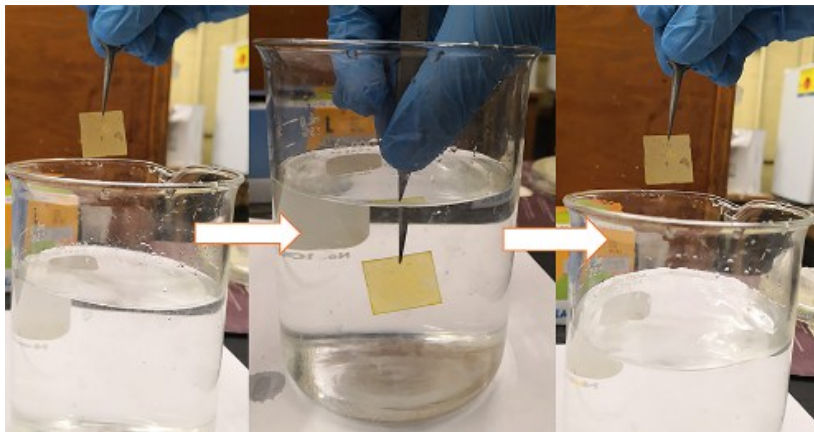

**Figure S1.** Photographs of PyPb<sub>3</sub> before (left) and after (right) dipping in water

**Table S1.** Crystal data and structure refinement for (C<sub>4</sub>H<sub>8</sub>NH)PbI<sub>3</sub>

|                                   |                                                    |
|-----------------------------------|----------------------------------------------------|
| compound                          | (C <sub>4</sub> H <sub>8</sub> NH)PbI <sub>3</sub> |
| empirical formula                 | C <sub>4</sub> H <sub>10</sub> NPbI <sub>3</sub>   |
| formula weight                    | 660.00                                             |
| temperature                       | 297K                                               |
| wavelength                        | 0.71073 Å                                          |
| crystal system                    | hexagonal                                          |
| space group                       | P63/mmc (No. 194)                                  |
| unit cell dimensions              | a= 9.3117(5) Å<br>c= 8.1080(4) Å                   |
| volume                            | 608.84(7) Å <sup>3</sup>                           |
| Z                                 | 1.99992                                            |
| density (calculated)              | 3.600 g·cm <sup>-3</sup>                           |
| absorption coefficient            | 21.405 mm <sup>-1</sup>                            |
| Absorption (exp)<br>Tmin, Tmax    | 2.53, 23.57                                        |
| F(000)                            | 564                                                |
| crystal size                      | 0.37*0.05*0.03 mm <sup>3</sup>                     |
| θ range for data<br>collection    | 2.526 to 30.433 °                                  |
| index ranges                      | -13<h<9<br>-8<k<13<br>-11<l<11                     |
| reflections collected             | 6688                                               |
| independent reflections           | 384 (Rint = 0.0406)                                |
| refinement method                 | Full-matrix least-squares on F <sup>2</sup>        |
| data / restraints / parameters    | 384/0/21                                           |
| goodness-of-fit on F <sup>2</sup> | 1.042                                              |
| final R indices [I>2σ(I)]         | 0.0235                                             |
| R indices (all data)              | 0.0589                                             |

## Reference

- 1 O. V. Dolomanov, L. J. Bourhis, R. J. Gildea, J. A. K. Howard and H. Puschmann, *J. Appl. Crystallogr.*, DOI:10.1107/S0021889808042726.
- 2 G. M. Sheldrick, *Acta Crystallogr. Sect. C Struct. Chem.*, , DOI:10.1107/S2053229614024218.
